# Supplementary material
Source: PubMed Central journal article supplement (PMC6507050)
Supplement: mmc1.pdf [file mmc1.pdf]

## Supplemental Data

### Mutations in *ACTL6B* Cause Neurodevelopmental Deficits and Epilepsy and Lead to Loss of Dendrites in Human Neurons

Scott Bell, Justine Rousseau, Huashan Peng, Zahia Aouabed, Pierre Priam, Jean-Francois Theroux, Malvin Jefri, Arnaud Tanti, Hanrong Wu, Ilaria Kolobova, Heika Silviara, Karla Manzano-Vargas, Sophie Ehresmann, Fadi F. Hamdan, Nuwan Hettige, Xin Zhang, Lilit Antonyan, Christina Nassif, Lina Ghaloul-Gonzalez, Jessica Sebastian, Jerry Vockley, Amber G. Begtrup, Ingrid M. Wentzensen, Amy Crunk, Robert D. Nicholls, Kristin C. Herman, Joshua L. Deignan, Walla Al-Hertani, Stephanie Efthymiou, Vincenzo Salpietro, Noriko Miyake, Yoshio Makita, Naomichi Matsumoto, Rune Østern, Gunnar Houge, Maria Hafström, Emily Fassi, Henry Houlden, Jolien S. Klein Wassink-Ruiter, Dominic Nelson, Amy Goldstein, Tabib Dabir, Julien van Gils, Thomas Bourgeron, Richard Delorme, Gregory M. Cooper, Jose E. Martinez, Candice R. Finnila, Lionel Carmant, Anne Lortie, Renske Oegema, Koen van Gassen, Sarju G. Mehta, Dagmar Huhle, Rami Abou Jamra, Sonja Martin, Han G. Brunner, Dick Lindhout, Margaret Au, John M. Graham Jr., Christine Coubes, Gustavo Turecki, Simon Gravel, Naguib Mechawar, Elsa Rossignol, Jacques L. Michaud, Julie Lessard, Carl Ernst, and Philippe M. Campeau

## **Supplemental Case Reports**

### **Recessive mutations**

#### **Individual R1**

Stable epilepsy, on a 4/1 ketogenic diet, lamictal, rivotril, frisium and Keppra. Very sensitive to heat and infections, with increased seizures at those time, but did not require changing the treatment. Stable global developmental delay, goes to school, has good waking periods, but there is no significant gain. Fine from the digestive point of view, still gavage-fed, which is well tolerated (she has had in the past periods with little tolerance to gavage-feeding and nausea, but this has not happened for about a year. Last aspiration pneumonia in December 2017). Hospitalized for a first treatment of bisphosphonate, this due to a worsening of her osteoporosis. The treatment was well tolerated, it caused a little fever, but without seizures. However, she received only two-thirds of the half-dose that she was to receive, but it is enough to reassure the team that she will be able to receive the next treatments.

#### **Individual R2**

The individual is a 5-year-old boy who was originally seen for genetic evaluation at 4 months of age due to history of hypotonia, developmental delay and failure to thrive as well as a family history of a sibling who died at age 5 years with history of intractable seizures, global developmental delay and hypotonia. There was no concerns or complications during pregnancy or delivery. Baby was born full term with normal vaginal delivery. His birth weight was 3.76 kg, length 48 cm and OFC was 35.5 cm. The individual also had history of GERD (gastroesophageal reflux disorder) with recurrent emesis as well as dysphagia. He underwent gastric tube placement with Nissen fundoplication at 14 months of age and his GI symptoms greatly improved. His first onset of seizures was at 3 years of age with complex partial epilepsy.

His brain MRI at 3 years of age was unremarkable but no recorded seizures on the EEG. He also had significant cortical visual impairment. His symptoms including hypotonia, global developmental delay, intellectual impairment and seizures continued to deteriorate and he died at 5 years of age. He underwent at 2 years of age whole exome sequencing which identified compound heterozygous mutations in the *ACTL6B* gene, c.695delC (p.P232fs) and a c.1275C>A (p.C425X). Both of these mutations were identified in his deceased sibling with a similar phenotype. Each parent was carrier for one of the mutations. The individual's brother had history of global developmental delay and hypotonia which were first noted around 4 months of age. He also has cortical visual impairment with intractable mixed seizures with onset at 2 years of age. His brain MRI showed cerebral atrophy and delayed white matter maturation followed by white matter loss including corpus callosum. He had history of GERD and underwent Nissen Fundoplication with gastric tube placement

### **Individual R5**

Age 1 year and 11 months. She has a pharmaco-resistant epilepsy. EEG shows a multifocal epileptiform activity and non-normal background activity. The girl has a severe global developmental delay, has some eye contact, no verbal communication and has no voluntary motor function. She has a severe dystonic motor pattern. She uses a jejunostomy for feeding.

### **Individuals R8a and R8b**

Full sisters of Mexican descent. Their parents are second cousins. Both individuals have severe global developmental delay. They are nonambulatory and nonverbal. Both have been diagnosed with spastic quadriplegic cerebral palsy GMFCS level V. Both have a history of

aspiration pneumonias and chronic lung disease. Both have seizure disorders with the elder sister having seizures by 5 months of age and the younger sister within the first month of life. Both have had MRIs of the brain which show thinned corpus callosum and white matter volume loss.

### **Individual R9**

This girl is the second child of non-consanguineous parents. She was born at term (40+3 weeks) with a birth weight of 3270 gram. At the age of 5 weeks her length was 53 cm (-0,5 SD), weight 4,2 kg (+0,1 SD) and her head circumference 35,5 cm (-1,1 SD). There is no relevant family history. She has a healthy older brother who was born with preaxial polydactyly of his left foot. The brother was tested negative for both ACTL6B mutations. Both parents are healthy carriers. She had severe epilepsy with antenatal onset; the mother reported “hick-ups with strange child movements” during pregnancy. EEG shows multifocal EEG abnormalities with intensive epileptic abnormalities of the left hemisphere. She had myoclonic seizures as well as tonic seizures. MRI cerebrum showed a thin corpus callosum, high signal intensity of dorsal globus pallidum/putamen and showed some asymmetric gyral pattern. At the age of 14 months she was examined: she had a significant developmental delay, head lag and she was not able to sit yet. Besides the seizures which are difficult to control with medication she had severe axial hypotonia, hypertonia of the extremities (spastic tetraparesis) and hyperreflexia. Also she needs feeding by gastric tube because of severe feeding problems and vomiting. She had extreme discomfort, which might be partially caused by chronic severe constipation and possibly a minor congenital anorectal malformation. The last examination was by a paediatrician at the age of 2 years and 4 months. She had an infection of the gastric tube which she was operated on and now gets a daily enema. This resulted in less discomfort. However, there is still some discomfort

with vomiting during the day. She has less seizures; but despite high doses different anti-epileptic medication she still has a lot of (mostly mild) seizures every day and also at night. She doesn't develop much (she makes contact and smiles, some babbling, but still head lag and no sitting).

## **Dominant mutations**

### **Individual D3**

Patient was enrolled in the Pediatric Genomics study conducted by HudsonAlpha Institute for Biotechnology in Huntsville, AL, USA in collaboration with Children's Rehabilitation Service and the Alabama Department of Rehabilitation Services. The *de novo* missense mutation NM\_016188.4:c.1027G>A p.Gly343Arg in *ACTL6B* was identified using whole genome sequencing of the affected child and both of his unaffected parents was performed and the result was confirmed by Sanger sequencing. This young boy was enrolled at 6 years and 6.5 months of age and at that time, he presented with global developmental delay, severe ID, hypotonia, absent speech, tracheomalacia, and ambulation difficulties. EEG was normal and no seizure activity was detected. Brain MRI, CGH, Microarray, and hearing screening were not remarkable. Gene panel testing for genes associated with Myotonic Dystrophy, Fragile X Syndrome, and Prader-Wili Syndrome were all normal. He has mild facial dysmorphism (hypertelorism, spaced teeth, low set ears, everted upper lip, and wide mouth). He also wears glasses (specific condition is unknown), has poor muscle tone, sensory processing abnormalities, and extreme joint laxity. At 7 years of age, the child was reported to be able to crawl, pull up, and feed himself using a spoon.

## **Individual D9**

9-year-old female, who has been followed since age 2 with a negative evaluation for Angelman syndrome that included SNP CMA, PWS/AS methylation testing and UBE3A sequence analysis. MECP2 sequencing was also negative. She has an unsteady gait with improving tone, strength, and fine motor skills. She is non-verbal and uses a picture device for communication (combination PECS/I-Pad system). She has some hand stereotypies and poorly coordinated eye movements with severe intellectual disability. Her receptive skills are better than her expressive skills, and she has a treatment diagnosis of autism. She is unable to cooperate with formal psychometric testing. She is partially toilet-trained, with very sensitive skin and a high pain threshold, and she had early onset of puberty with early pubertal dentition. She had a single febrile seizure that did not recur. She has not had an MRI. She has a normal sister and a less severely-affected female cousin born to her dad's brother with seizures and intellectual disability. Exam revealed height at the 75<sup>th</sup>-90<sup>th</sup> centile, weight 75<sup>th</sup>-90<sup>th</sup> centile, and head circumference 50<sup>th</sup>-75<sup>th</sup> centile. She had a 5 x 3 cm mole on her right flank. She had ocular hypertelorism (OCD 9.8 cm,+4 SD above the mean; IPD 6.0 cm, +2 SD; and ICD 3.5 cm, +2 SD). There is a disruption of the medial eyebrows with nearly absent medial portion. She has a somewhat squared off nasal tip. She has a high, narrow anterior palate with mixed dentition and a short philtrum. A bifid uvula was noted previously. Breast buds were apparent, Tanner II-III. Long appearing palms with 5th fingers remarkably shortened bilaterally. There are prominent digital pads on the thumb and the 4<sup>th</sup> fingers bilaterally. She has malalignment of her toes, with her 3rd toe underneath her 4<sup>th</sup> toe and broad halluces. Her toes are also broad with somewhat small nails, and she has broad distal phalanges on her fingers with small nails. She was non-verbal with relatively normal tone and severe intellectual disability.

## **Individual D10**

Female patient with developmental delay, intellectual disability. global hypotonia, walking at 6y3m, ataxic gait with hyperlordosis, no language but says "mama", no seizures. kindness but very anxious; stereotypies strabismus, astigmatism. One brother with same problems, better evolution/better management and no problems at birth, same mutation. Father : intellectual disability, abnormal behavior (psychiatric).

## Supplementary Figures and Legends

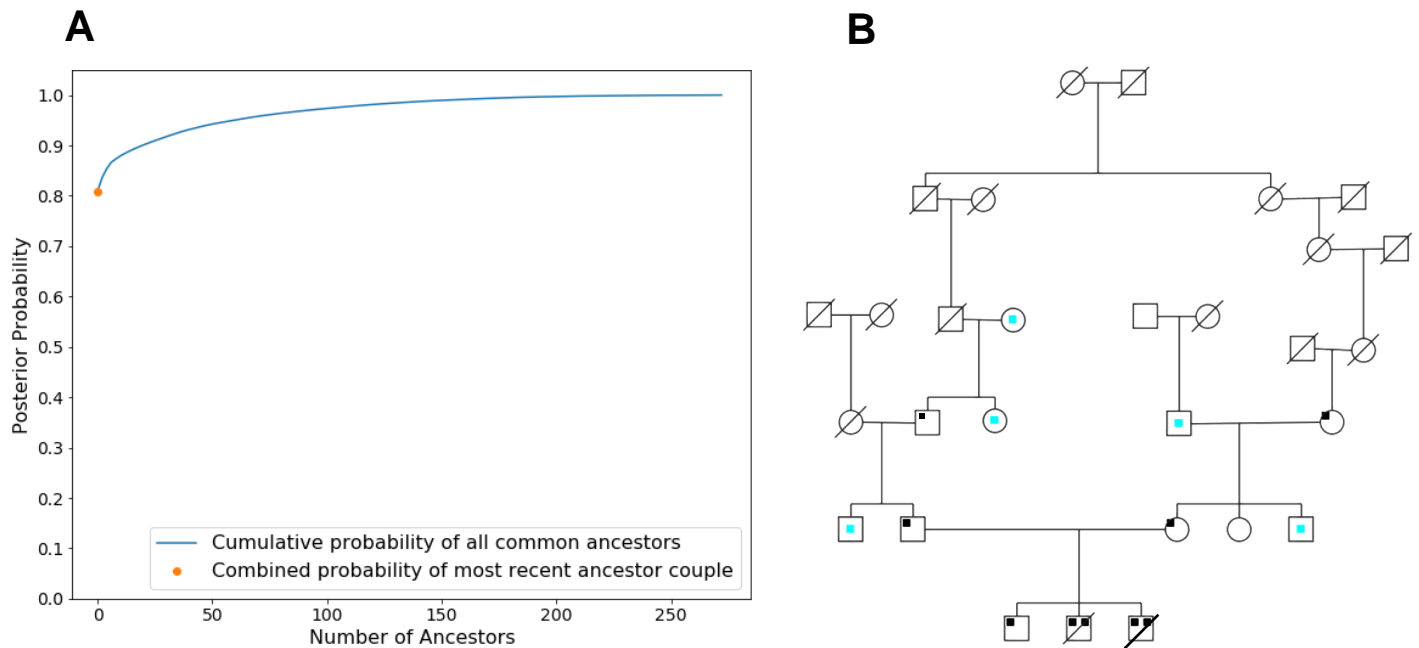

Figure S1. A) The most recent common ancestor couple of the parents of family R3 are the most likely origin of the affected *ACTL6B* allele, with a posterior probability of 0.809. Details on how this probability was calculated can be found in the supplemental methods. Church marriage records from Quebec revealed that the father and mother of R3a and R3b had a common ancestor 4 and 5 generations back, respectively. Common ancestor also independently confirmed by family. B) Pedigree of family R3. Church marriage records from Quebec revealed that the father and mother of R3a and R3b had a common ancestor 4 and 5 generations back, respectively. Common ancestor independently confirmed by family. Black squares denote presence of mutation; blue squares signify that the individual was assessed for the presence of the mutation, but that it was absent.



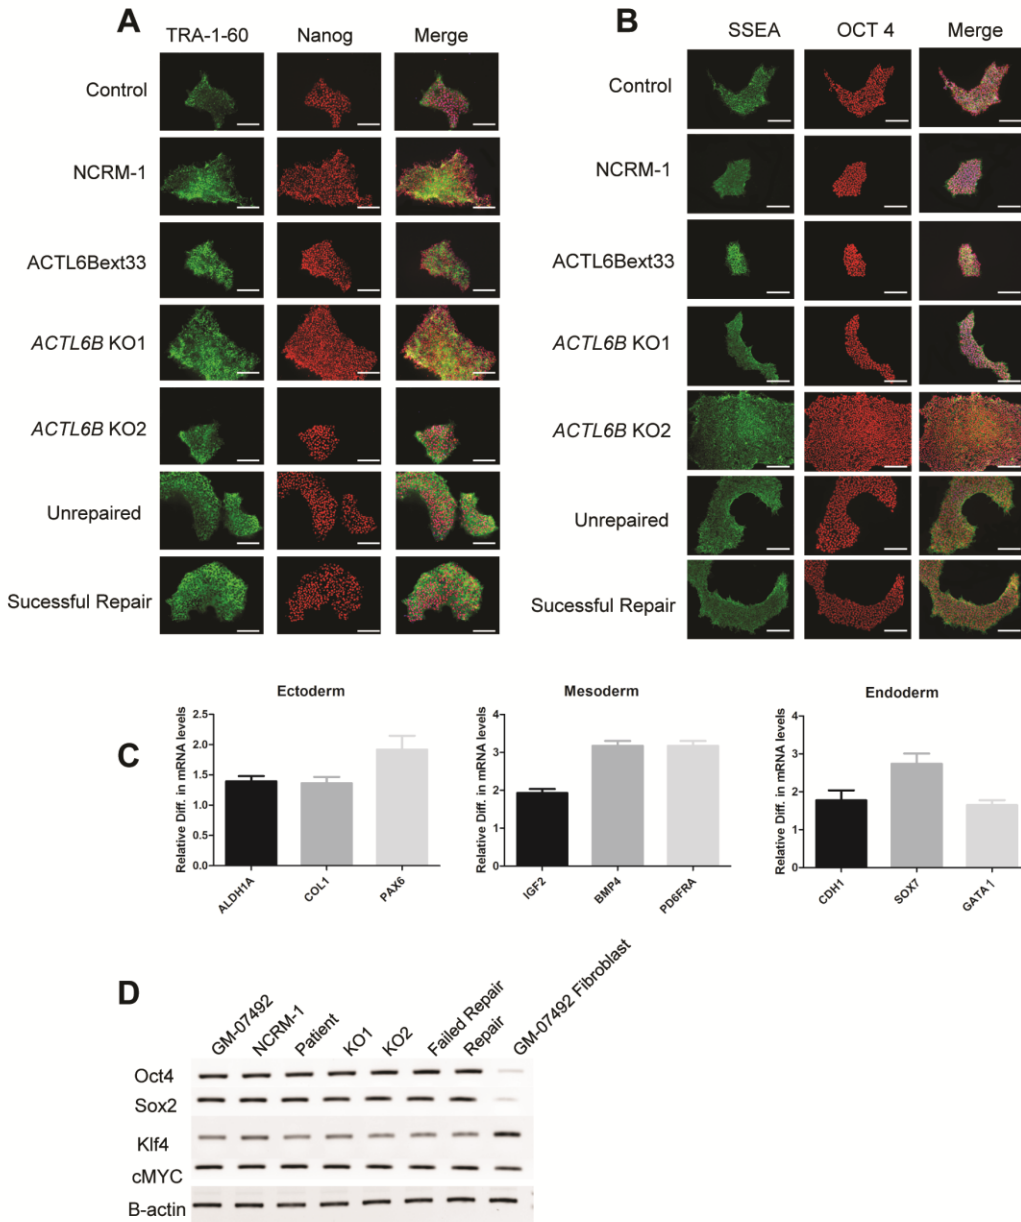

Figure S2. Characterization of pluripotency markers in induced pluripotent stem cell lines. A-B) Immunocytochemistry of four pluripotency markers (TRA-1-60, Nanog, SSEA and OCT4) in all iPSC lines used in this study. Scale bars represent 200 $\mu$ m. C) qPCR assessment of key genes in all cell lines utilized in this study following differentiation for eight days into a ectoderm, mesoderm and endoderm lineage. Scale is relative to expression of genes in a sample composed of equal parts of all three germ layers. D) Assessment of the expression of pluripotency genes in cDNA obtained from iPSCs. Primers bind only to endogenously expressed genes.

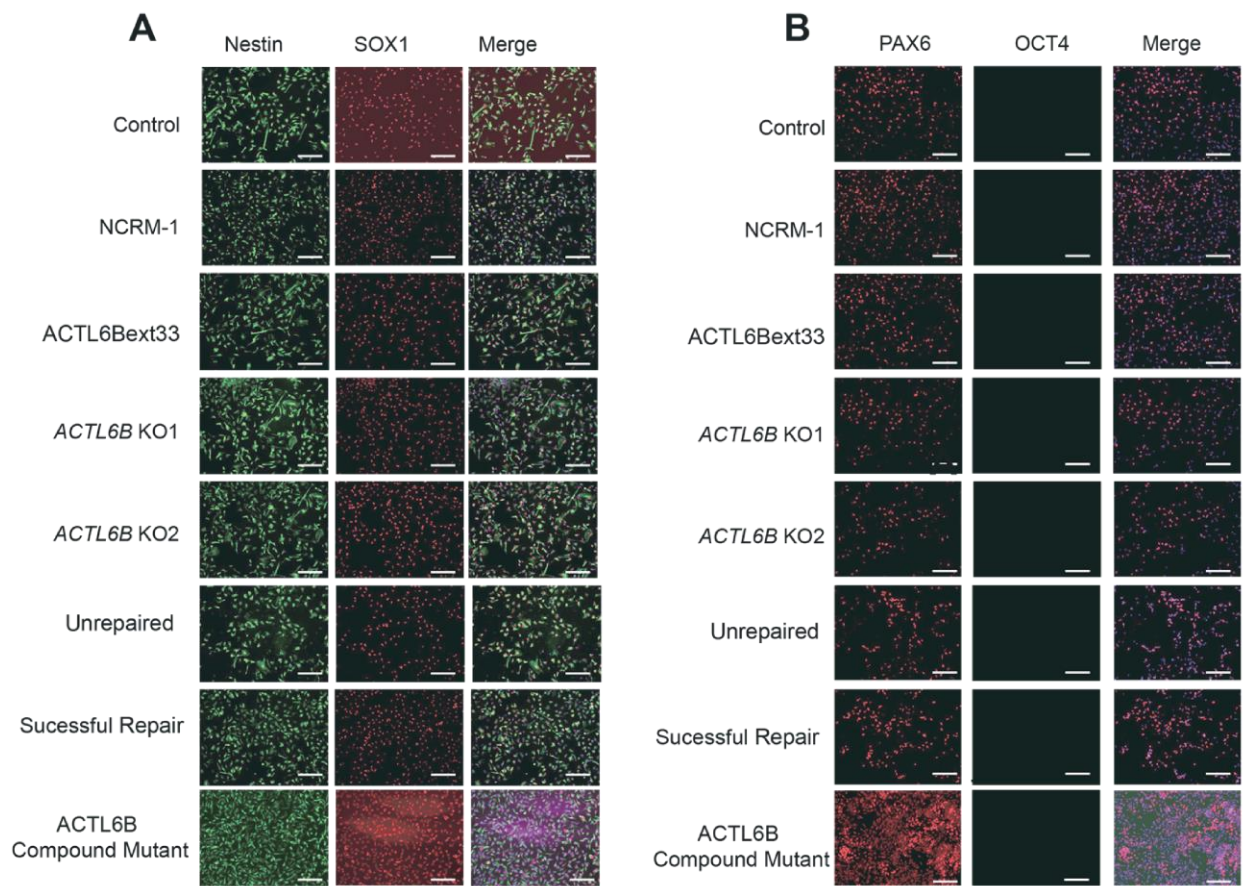

Figure S3. Characterization of neural lines generated for this study. A-B) ICC staining of all NPC lines generated in this study, showing positive staining of forebrain NPCs (Nestin, SOX1, PAX6) and negative staining pluripotency markers (OCT4). Scale bars represent 200µm.

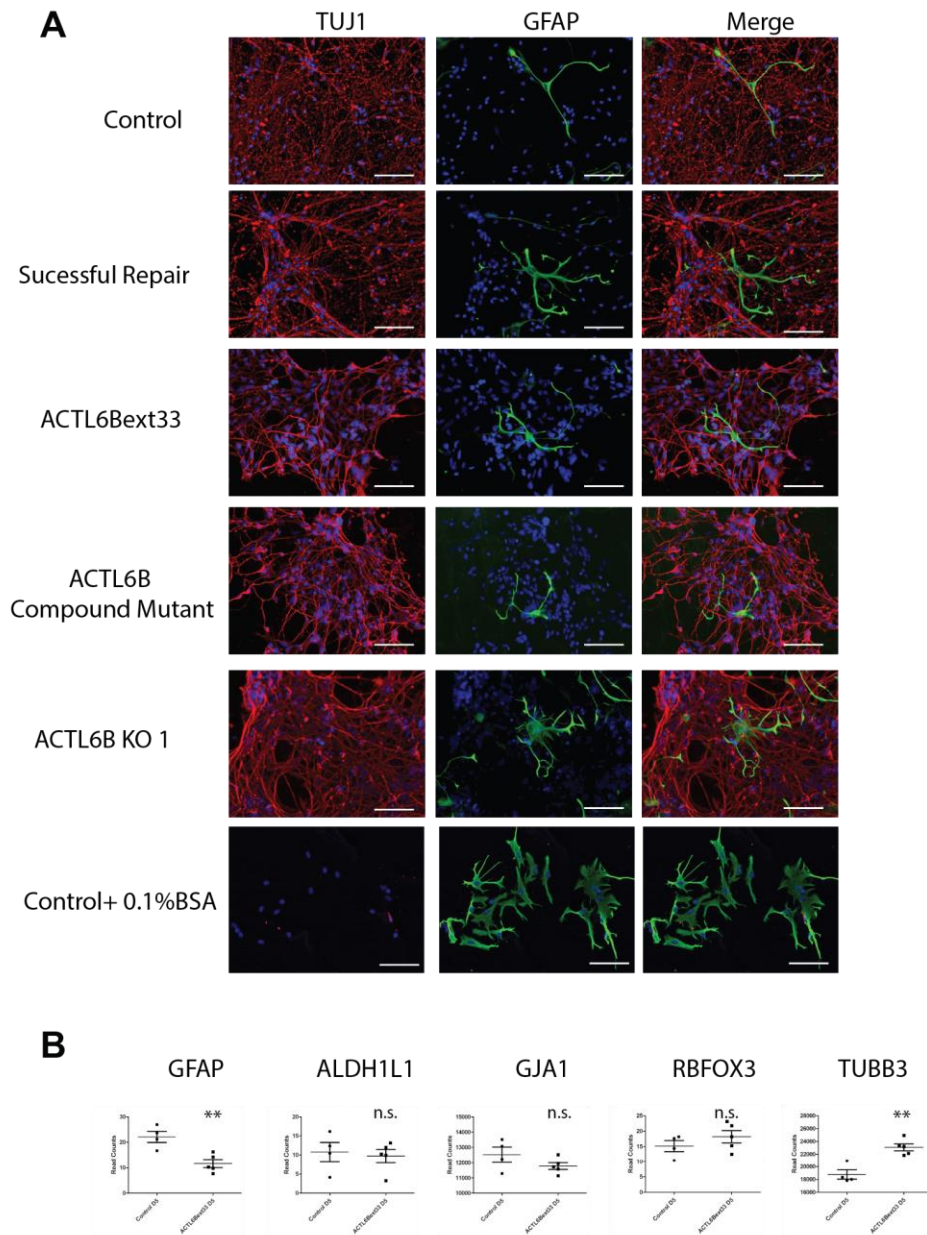

Figure S4. No difference in GFAP-positive cells in mutant, wildtype, or engineered cell lines

- A) Staining of control, ACTL6Bext33, ACTL6Bcompoundmutant, and gene-edited lines for TUJ1 and GFAP, demonstrating a small percentage of cells are positive for GFAP staining. B) Read counts from D5 RNA-SEQ data from control and ACTL6Bext33 neurons for select astrocytic and neuronal genes (N=5). P<0.05, \*\*P<0.01.

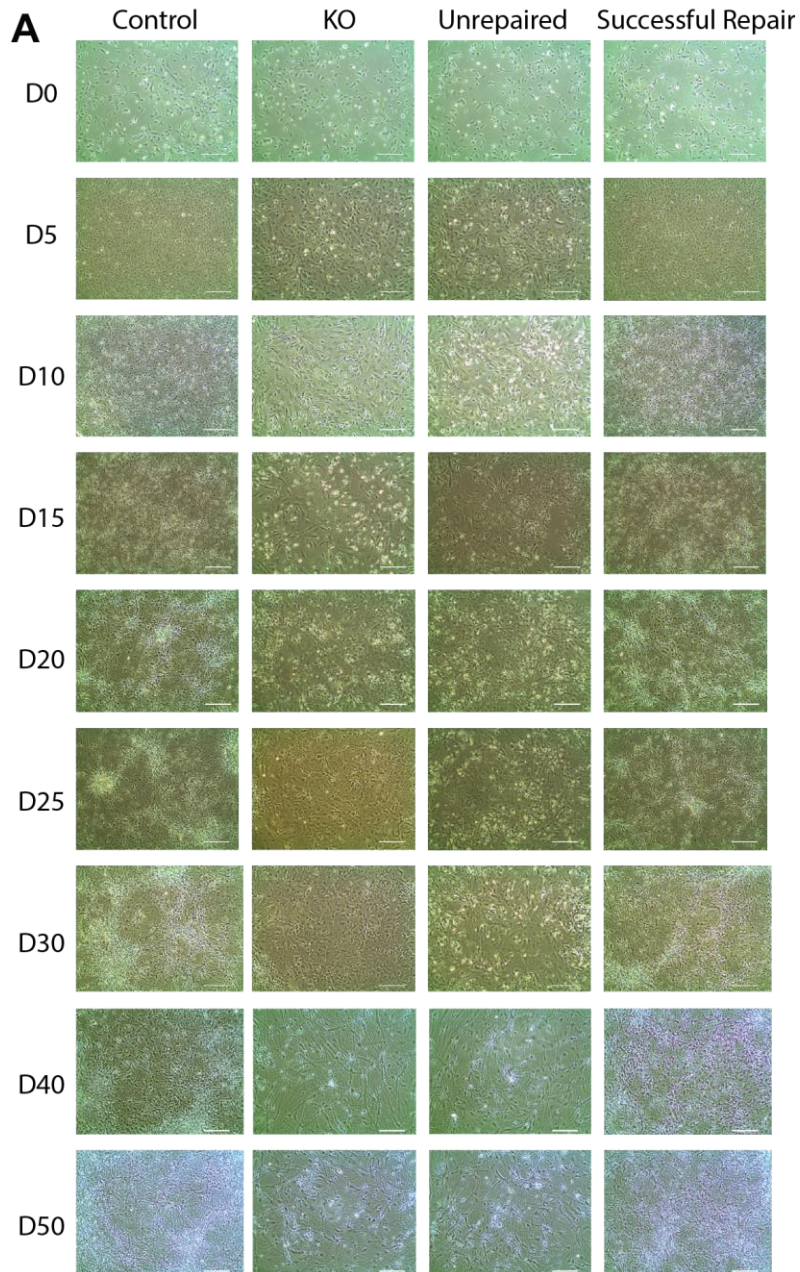

Figure S5. Morphology of CRISPR modified neuronal lines during differentiation.

Bright field images of Control, KO, Unrepaired, and Successful Repair cell lines during fifty days of neuronal differentiation. Scale bars represent 100 $\mu$ m. Note that both KO and Unrepaired lines consistently show larger nuclei.



## Supplementary Tables

Table S1. Additional clinical details for patients with bi-allelic mutations in *ACTL6B*.

| Individual              | R1                                                                                                       | R2                                                                                                                                                                                                                                      | R3                                                                                                                                                                                                                                                          | R4                              | R5                                                                                                                     | R6                                                                 | R7                                                     | R8a                                                                                                      | R8b                                                                                                      | R9                                                                                                                                                                                                                                         | R10                                                 |
|-------------------------|----------------------------------------------------------------------------------------------------------|-----------------------------------------------------------------------------------------------------------------------------------------------------------------------------------------------------------------------------------------|-------------------------------------------------------------------------------------------------------------------------------------------------------------------------------------------------------------------------------------------------------------|---------------------------------|------------------------------------------------------------------------------------------------------------------------|--------------------------------------------------------------------|--------------------------------------------------------|----------------------------------------------------------------------------------------------------------|----------------------------------------------------------------------------------------------------------|--------------------------------------------------------------------------------------------------------------------------------------------------------------------------------------------------------------------------------------------|-----------------------------------------------------|
| Family history          |                                                                                                          | Family history is significant for a brother who passed away at 5 years old who had a history of developmental delay, hypotonia, intractable seizures, hypotonia, gastroesophageal reflux disease (GERD), and cortical visual impairment | Full brother also affected with epileptic encephalopathy, died at 2 years old. Healthy older brother who carries heterozygous mutation and has no pathological phenotype. 23 family members sequenced (incl great parents of R3), and no homozygotes found. | Healthy younger brother         | Single child of healthy unrelated parents                                                                              | Parents healthy. Healthy brother                                   | Healthy parents                                        | Full sister also affected. No other siblings. Parents are second cousins. No other affected relatives.   | Full sister also affected. No other siblings. Parents are second cousins. No other affected relatives.   | Healthy older brother has preaxial polydactyly left foot, both parents are healthy. No relevant family history, except for nephew of mother (son of brother of her father) who died at age of 7 months because of (genetic) liver disease. | No affected relative                                |
| Birth growth parameters | 3020g, 51cm, OFC 34 cm                                                                                   |                                                                                                                                                                                                                                         | 2972g, 49cm, OFC 33.5 cm                                                                                                                                                                                                                                    | 2314g, 47.3cm, OFC 32.0cm       | prenatal microcephaly birthweight 3280 grams, length 51 cm, OFC 32 cm                                                  | 7pds 5 oz, L 20 and ¼ in                                           | NM_016188:exon4:c.C289T;p.R97X (homozygous)            | 2.62kg at 36 weeks EGA                                                                                   | 3.486kg at 38 weeks EGA                                                                                  | Birthweight: 3270 gr (40+3 wk)<br><br>At age 5 weeks: 53 cm (-0.5 SD), 4.2 kg (+0.1 SD) and OFC 35.5 cm (-1.1 SD)                                                                                                                          | NA                                                  |
| Age at last visit       | 3 y.o. F                                                                                                 | 3 1/2y.o. M                                                                                                                                                                                                                             | 11 m.o. (death at 4 yo)                                                                                                                                                                                                                                     | 8 yo F                          | 5 months                                                                                                               | 12 m.o.                                                            | 4 y.o.                                                 | 6yo F                                                                                                    | 5yo F                                                                                                    | 14 months                                                                                                                                                                                                                                  | 4.5y F                                              |
| Height                  | 73 cm (-5.5 SD)                                                                                          | failure to thrive                                                                                                                                                                                                                       | 76 cm (50 <sup>th</sup> )                                                                                                                                                                                                                                   | 117.8 cm                        | 60.5 cm (10 <sup>th</sup> %ile)                                                                                        | 70 cm (1%ile)                                                      | NI                                                     | 18mo 72cm (-2.5 SD)                                                                                      | 4mo 59.5cm (22 <sup>nd</sup> %ile)                                                                       | 79 cm (+0.4 SD)                                                                                                                                                                                                                            | NA                                                  |
| Weight                  | 10 <sup>th</sup> %ile                                                                                    | Short stature                                                                                                                                                                                                                           | 8.58 kg (10 <sup>th</sup> )                                                                                                                                                                                                                                 | 17.9 kg                         | 5.8 kg (10 <sup>th</sup> %ile)                                                                                         | 7.2 kg (1%ile)                                                     | NI                                                     | 18mo 9.985kg (17 <sup>th</sup> %ile)                                                                     | 4mo 5.63kg (25 <sup>th</sup> %ile)                                                                       | 9.4 kg (-0.8 SD)                                                                                                                                                                                                                           | 11.2 (-3.8 SD)                                      |
| ID, DD                  | Significant developmental delay                                                                          | Delayed motor milestones, delayed speech, delayed visual maturation.                                                                                                                                                                    | Developmental delay                                                                                                                                                                                                                                         | Developmental delay             | Severe global developmental delay                                                                                      | Severe GDD/ID. Nonverbal, non ambulatory                           | Yes, severe GDD                                        | severe global developmental delay, nonverbal, nonambulatory                                              | severe global developmental delay, nonverbal, nonambulatory                                              | Significant developmental delay, not able to sit yet                                                                                                                                                                                       | Yes                                                 |
| Neuro findings          | Axial hypotonia, spasticity 4 limbs, dystonia neck and L arm, choreoathetotic mouth movements (resolved) | Axial hypotonia, lower extremities hypertonia/spasticity.                                                                                                                                                                               | Axial hypotonia, spasticity 4 limbs                                                                                                                                                                                                                         | Axial hypotonia                 | Severe stimulus induced dystonia. Generalized hypertonia hyperreflexia and spasticity..                                | Hypertonia, spasticity, cerebral palsy, cortical visual impairment | Hypotonia, lower limbs spasticity, developmental delay | spastic quadriplegia and dystonia with truncal hypotonia, GMFCS level V                                  | spastic quadriplegia and dystonia with truncal hypotonia, GMFCS level V                                  | Axial severe hypotonia, severe epilepsy (antenatal onset), hypertonia extremities (spastic tetraparesis), hyperreflexia                                                                                                                    | Axial hypotonia, Limb spasticity                    |
| Feeding difficulties    | Yes                                                                                                      | Feeding difficulties (Dysfunctional swallow), GERD                                                                                                                                                                                      | Difficulty swallowing                                                                                                                                                                                                                                       | Yes, difficulties in swallowing | increasing feeding difficulties<br><br>Gastrostomy from the age of five months                                         | G-tube fed, GERD                                                   | Yes, difficulties in swallowing                        | A: Completely G-tube dependent, fundoplication, GERD                                                     | B: Completely GJ tube dependent, GERD                                                                    | Severe (recently gastric tube)                                                                                                                                                                                                             |                                                     |
| Epilepsy                | Started at 3 months. Myoclonias 2-6 per day. Multifocal EEG anomalies                                    | Complex partial epilepsy with onset at age 3 years. Seen recently at 5 years of age by neurology and he seems to have complex partial epilepsy with possible tonic epilepsy that is intractable and getting daily.(deceased             | Multifocal EEG abnormalities                                                                                                                                                                                                                                | No EEG abnormalities            | Started at 2 months of age. EEG shows multifocal epileptiform activity and generalized slowing of background patterns. | Started at 3 w.o. with infantile spasms. Epileptic encephalopathy  | Multifocal EEG abnormalities, seizures since infancy   | Seizures since infancy, usually daily seizure episodes, generalized slowing of background rhythms on EEG | Seizures since infancy, usually daily seizure episodes, generalized slowing of background rhythms on EEG | Started antenatal (mother felt "hick-ups with strange childmovements" during pregnancy) Multifocal EEG abnormalities, intensive epileptic abnormalities left hemisphere myoclonic seizures AND tonic seizures                              | Infantile spasms, then Tonic and myoclonic seizures |

|                                           |                                                         |                                                                                                                                                                            |                                                                                                           |                                                                |                                                                                                                                                                                                                                                         |                                                                                                                             |                                  |                                                                                                                     |                                                                                                                                                                                    |                                                                                                                                |                                                                 |
|-------------------------------------------|---------------------------------------------------------|----------------------------------------------------------------------------------------------------------------------------------------------------------------------------|-----------------------------------------------------------------------------------------------------------|----------------------------------------------------------------|---------------------------------------------------------------------------------------------------------------------------------------------------------------------------------------------------------------------------------------------------------|-----------------------------------------------------------------------------------------------------------------------------|----------------------------------|---------------------------------------------------------------------------------------------------------------------|------------------------------------------------------------------------------------------------------------------------------------------------------------------------------------|--------------------------------------------------------------------------------------------------------------------------------|-----------------------------------------------------------------|
|                                           |                                                         | brother with complex partial, possible atonic/tonic seizures)                                                                                                              |                                                                                                           |                                                                |                                                                                                                                                                                                                                                         |                                                                                                                             |                                  |                                                                                                                     |                                                                                                                                                                                    |                                                                                                                                |                                                                 |
| MRI                                       | Prominent subarachnoid spaces and small corpus callosum | MRI of brain at 4 years of age was normal. Deceased brother: white matter loss. Interval enlargement of sulci and ventricles suggesting atrophy or Possibly pseudoatrophy) | Mild T2 hyperintensity in frontal periventricular white matter                                            | Mild T2 hyperintensity in frontal periventricular white matter | The first MRI of the head performed at 1 week of age was normal. The second MRI of the head performed at 2 months of age showed symmetric signal changes in the brainstem and in the dorsal medulla oblongata, possibly also around the dentate nucleus | 3 w.o.: asymmetric ventricles, cortical dysplasia right parietal lobe. 9 m: cerebral atrophy, hypoplasia of corpus callosum | NA                               | MRI at 5mo: Significantly decreased white matter throughout, extremely thin corpus callosum. Normal MR spectroscopy | MRI at 10mo: Periventricular leukomalacia with white matter volume loss and overall brain volume loss, delayed myelination and thinning of corpus callosum. Normal MR spectroscopy | Thin corpus callosum<br>High signal intensity dorsal globus pallidus/putamen<br>Some asymmetry gyral pattern                   | At 3.5yo: Cerebral and cerebellar atrophy, thin corpus callosum |
| Rx                                        | Mogadon, valproate, Topamax, prevacid and bicarbonate   | Oxcarbazepine. Deceased brother had vagal nerve stimulator implantation                                                                                                    | Tegretol, rivotril, Neurontin, prevacid, melatonin                                                        | No medication                                                  | Valproate<br>Levetiracetam<br>Nitrazepam<br>Esomeprazol<br>Midazolam (as emergency medication)<br><br>Botulinum toxin injections in the hip-adductors                                                                                                   | Sabril, onfi, felbamate, augmentin, baclofen. Did not tolerate levetiracetam, topiramate, prednisolone                      | NA                               | Baclofen, QVAR, Klonopin, Lamictal, Keppra, lansoprazole                                                            | Baclofen, Vimpat, Keppra, lorazepam, omepرازole                                                                                                                                    | Different medication:<br>At this moment: fycampa perampanel, clobazam, levetiracetam, chloralhydraat, baclofen, Nexium, forlax | NA                                                              |
| Dysmorphisms                              | High arched palate, thick gums, strabism,               | Scaphocephaly with bi-temporal narrowing, otherwise non-dysmorphic. Deceased brother not dysmorphic                                                                        | Narrow palate, Strabismus,                                                                                | Rt outer strabismus                                            | She does not look dysmorphic                                                                                                                                                                                                                            | Nondysmorphic. Microcephaly, micrognathia, high-arched palate                                                               | Not available                    | Microcephalic but not overly dysmorphic                                                                             | Microcephalic but not overly dysmorphic                                                                                                                                            | Asymmetric skull/face (right side fuller) , microcephaly, but no evident dysmorphic features                                   | NA                                                              |
| Other                                     |                                                         | Chronic aspiration needed salivary gland botox                                                                                                                             | Increased inhibin A during pregnancy. Heart US normal. Abdominal US normal. Orange hue to skin and tongue |                                                                | spectroscopy did not document a lactate peak                                                                                                                                                                                                            | Aspiration pneumonia. Metab wo nl, died at age 2.                                                                           |                                  | Both: chronic lung disease with aspiration pneumonias, asthma, and frequent viral infections                        | chronic lung disease with aspiration pneumonias, asthma, and frequent viral infections                                                                                             | - Chronic severe constipation possibly due to minor anorectal malformation and vomiting                                        | NA                                                              |
| Site for sequencing                       | Genome Quebec                                           | Illumina                                                                                                                                                                   | Genome Quebec                                                                                             | Yokohama City University Graduate School of Medicine           | Haukeland University Hospital, University of Bergen                                                                                                                                                                                                     | GeneDx                                                                                                                      | University College London        | GeneDx                                                                                                              | UCLA Clinical Genomics Center                                                                                                                                                      | Radboud University Medical Center in Nijmegen                                                                                  | Genome Quebec                                                   |
| WES or WGS                                | WGS                                                     | WGS                                                                                                                                                                        | WES                                                                                                       | WES                                                            | WES                                                                                                                                                                                                                                                     | WES                                                                                                                         | WES                              | WES                                                                                                                 | WES                                                                                                                                                                                | WES                                                                                                                            | WGS                                                             |
| Library capture                           | Illumina TruSeq                                         | Illumina TruSeq                                                                                                                                                            | Agilent SureSelect Human All Exon v4                                                                      | Agilent SureSelect Human All Exon v4                           | Roche-NimbleGen Sequence Capture EZ Exome v2 kit                                                                                                                                                                                                        | Agilent SureSelect Human All Exon v4                                                                                        | Illumina's Nextera Rapid Capture | Agilent SureSelect Human All Exon v4                                                                                | Agilent SureSelect Human All Exon 50 Mb kit                                                                                                                                        | Agilent SureSelect Human All Exon v4                                                                                           | Illumina TruSeq                                                 |
| Sequencing                                | Illumina HiSeq                                          | Illumina HiSeq                                                                                                                                                             | Illumina HiSeq                                                                                            | Illumina HiSeq                                                 | Illumina HiSeq                                                                                                                                                                                                                                          | Illumina HiSeq                                                                                                              | Illumina HiSeq                   | Illumina HiSeq                                                                                                      | Illumina HiSeq                                                                                                                                                                     | Illumina HiSeq                                                                                                                 | Illumina HiSeq                                                  |
| Alignment                                 | BWA-mem v.0.7.10 and Picard                             | Illumina WGS Informatics Pipeline version 2.01-02 using the ISAAC package                                                                                                  | BWA                                                                                                       | NovoAlign, Picard                                              | BWA v.0.5.8c and Picard                                                                                                                                                                                                                                 | BWA-Mem v.0.7.8, GATK v.1.6                                                                                                 | Novoalign                        | BWA-Mem v.0.7.8, GATK v.1.6                                                                                         | Novoalign, SAMtools, GATK                                                                                                                                                          | BWA, GATK                                                                                                                      | BWA-mem v.0.7.10 and Picard                                     |
| Variant calling, filtering and annotation | GATK, Annovar                                           | Same as above                                                                                                                                                              | GATK, in house pipeline                                                                                   | GATK, Annovar                                                  | GATK, Annovar                                                                                                                                                                                                                                           | SAMtools v.0.1.18                                                                                                           | Annovar                          | SAMtools v.0.1.18                                                                                                   | GATK                                                                                                                                                                               | in house pipeline                                                                                                              | GATK, Annovar                                                   |
| ACMG classification of variants           | Uncertain Significance                                  | Uncertain Significance                                                                                                                                                     | Uncertain Significance                                                                                    | Uncertain Significance                                         | Uncertain Significance                                                                                                                                                                                                                                  | Uncertain Significance                                                                                                      | Uncertain Significance           | Uncertain Significance                                                                                              | Uncertain Significance                                                                                                                                                             | Uncertain Significance                                                                                                         | Uncertain Significance                                          |
| Reference for exome method                | 1                                                       | 2                                                                                                                                                                          | 1                                                                                                         | 3                                                              | 4                                                                                                                                                                                                                                                       | 5                                                                                                                           | 6                                | 5                                                                                                                   | 7                                                                                                                                                                                  | 8                                                                                                                              | 1                                                               |

Table S2. Additional clinical details for patients with *de novo* mutations in *ACTL6B*.

| Individual              | D1                                                            | D2                                                                                                                                                                                            | D3                                                                           | D4                                                                                                                                                              | D5                                                                          | D6                                                                                                                 | D7                                                                                                                                                                                           | D8                                                                                    | D9                                                                                                                                                                                           |
|-------------------------|---------------------------------------------------------------|-----------------------------------------------------------------------------------------------------------------------------------------------------------------------------------------------|------------------------------------------------------------------------------|-----------------------------------------------------------------------------------------------------------------------------------------------------------------|-----------------------------------------------------------------------------|--------------------------------------------------------------------------------------------------------------------|----------------------------------------------------------------------------------------------------------------------------------------------------------------------------------------------|---------------------------------------------------------------------------------------|----------------------------------------------------------------------------------------------------------------------------------------------------------------------------------------------|
| De novo mutation        | NM_016188.4:c.1027 G>A, p.Gly343Arg                           | NM_016188.4:c.1027 G>A, p.Gly343Arg                                                                                                                                                           | NM_016188.4:c.1027 G>A, p.Gly343Arg                                          | NM_016188.4:c.1027 G>A, p.Gly343Arg                                                                                                                             | NM_016188.4:c.1027 G>A, p.Gly343Arg                                         | NM_016188.4:c.1027 G>A, p.Gly343Arg                                                                                | NM_016188.4:c.1027 G>A, p.Gly343Arg                                                                                                                                                          | NM_016188.4:c.1027 G>A, p.Gly343Arg                                                   | NM_016188.4:c.230 A>G, p.Asp77Gly                                                                                                                                                            |
| Birth growth parameters | Weight 50TH CENTILE<br>Length 50th centile<br>OFC 2nd centile | NA                                                                                                                                                                                            | 3355g, 53 cm                                                                 | Weight 2.75kg 7th centile                                                                                                                                       | normal parameters                                                           | Weight : 2976g<br><br>Length: 53 cm                                                                                | 3.5 Kg, 51 cm length, OFC 35                                                                                                                                                                 | 39+5w, 2680 g                                                                         | NA                                                                                                                                                                                           |
| Age at last visit       | 5y6m M                                                        | 29y F                                                                                                                                                                                         | 6y6m M                                                                       | 5y9m F                                                                                                                                                          | 4y6m F                                                                      | 3 F                                                                                                                | 21y F                                                                                                                                                                                        | 2y 6m F                                                                               | 8y F                                                                                                                                                                                         |
| Height in cm            | 110 (5 <sup>th</sup> %ile)                                    | 163 (50 <sup>th</sup> %ile)                                                                                                                                                                   | 114 (-2.0 SD)                                                                | NA                                                                                                                                                              | 109 (63 <sup>th</sup> %ile)                                                 | 91.4 cm (17 <sup>th</sup> %ile)                                                                                    | 166 cm (67 <sup>th</sup> %ile)                                                                                                                                                               | Length 89cm (-0.7SD);                                                                 | (75 <sup>th</sup> -90 <sup>th</sup> %ile)                                                                                                                                                    |
| Weight in kg            | 18 (5 <sup>th</sup> %ile)                                     | 63 (60 <sup>th</sup> %ile)                                                                                                                                                                    | 18.2 (-2.1 SD)                                                               | 16.5 (-2.2 SD)                                                                                                                                                  | 19 (69 <sup>th</sup> %ile)                                                  | 13.1 kg (18 <sup>th</sup> %ile)                                                                                    | 44.7 kg (3 <sup>rd</sup> %ile)                                                                                                                                                               | Weight 11.1 kg (-1.8 SD);                                                             | (75 <sup>th</sup> -90 <sup>th</sup> %ile)                                                                                                                                                    |
| ID, DD                  | severe ID, absent speech and ambulation                       | Global DD (sitting position without help: 24 months, first steps without help: 42 months), severe ID, absent speech at time of the inclusion                                                  | Global DD, severe ID, absent speech and ambulation difficulties              | Severe ID 10-20 words, occasionally 2 words together. Receptive skills better than expressive skills.                                                           | severe mental retardation,                                                  | Sits independently and roll over but can't crawl, cruise or walk. She is nonverbal but very alert and interactive. | Severe ID, absent speech . Limited ambulation, uses wheelchair, rolls over to move around, can walk with extensive support from walker aid.                                                  | IQ test showed developmental age of 9 months at chronological age 29 months (-IQ 30). | Severe ID, with absent speech and communicated mostly using gestures and sounds. stronger receptive skills than her expressive language skills                                               |
| Neuro                   | NA                                                            | Severe hypotonia, wide based gait (cerebellar syndrome), feeding difficulties                                                                                                                 | Hypotonia                                                                    | Autistic features Happy disposition, wide based gait, Obsessions, easily excitable, short attention span                                                        | hypotonia , stereotypies                                                    | Hypotonia                                                                                                          | Rett/AS-like handwringing;                                                                                                                                                                   | Able to stand but not walk. Can stands on her toes.                                   | autism                                                                                                                                                                                       |
| Epilepsy                | No seizures, EEG nl                                           | No seizures and EEG in the normal range                                                                                                                                                       | EEG-nl ; no seizures                                                         | No                                                                                                                                                              | No                                                                          | No seizures                                                                                                        | infantile spasms first episode, 3 months; subsided at 18 months. unresponsive to vigabatrin nocturnal GTCS with focal onset at starting age 18; lasted 3 years.                              | No                                                                                    | NA                                                                                                                                                                                           |
| MRI                     | Normal                                                        | None                                                                                                                                                                                          | Normal on several examinations                                               | Normal                                                                                                                                                          | Normal                                                                      | reportedly showed some thinning of the corpus callosum (done at the outside institution)                           | Generalised atrophy 2y                                                                                                                                                                       | mild periventricular gliosis, possibly consistent with perinatal damage.              | NA                                                                                                                                                                                           |
| Rx                      | NA                                                            | None                                                                                                                                                                                          | None                                                                         | NA                                                                                                                                                              | None.                                                                       | none                                                                                                               | zonegran, keppra, midazolam, chloralhydrate, Lamotrigin, Diazepam if needed.                                                                                                                 | No                                                                                    | NA                                                                                                                                                                                           |
| Dysmorphisms            | Prominent forehead, hypertelorism, wide mouth, brachycephaly  | Prominent forehead, hypertelorism, broad and bulbous nasal tip, low set ears, short philtrum, thin and everted upper lip, wide mouth, widely spaced teeth, long palms with short 5th fingers, | Hypertelorism, spaced teeth, low set ears, everted upper lip, and wide mouth | Broad forehead Deep set eyes Narrow palpebral fissures Upturned nasal tip Flushed cheeks Carp shaped mouth Thickened helices of the ears Narrow feet Sandal gap | No dysmorphisms, no short phalanges or nails, no prominent or wide forehead | Normocephalic, mild pseudostrabismus and telecanthi. Ears were normal.                                             | Forehead slightly high broad, wide nostrils, upturned tip of nose wide mouth, short philtrum, thick everted lips lower lip>upper lip, widely spaced teeth especially between upper incisives | No dysmorphic features.                                                               | Ocular hypertelorism, with absence of the medial eyebrows, a broad nasal tip, a short philtrum and high narrow anterior palate. Long palms with 5th fingers, prominent persistent fetal pads |



|                                           |                                                                |                                                                                                           |                                                                                                                           |                                                             |                                                                                                                               |                                                                                                                                                                                                                                                          |                                                                                                                                                                                                                                                                                     |                                                                                             |                                                                                                                       |
|-------------------------------------------|----------------------------------------------------------------|-----------------------------------------------------------------------------------------------------------|---------------------------------------------------------------------------------------------------------------------------|-------------------------------------------------------------|-------------------------------------------------------------------------------------------------------------------------------|----------------------------------------------------------------------------------------------------------------------------------------------------------------------------------------------------------------------------------------------------------|-------------------------------------------------------------------------------------------------------------------------------------------------------------------------------------------------------------------------------------------------------------------------------------|---------------------------------------------------------------------------------------------|-----------------------------------------------------------------------------------------------------------------------|
|                                           |                                                                |                                                                                                           |                                                                                                                           | Short broad nails on the feet                               |                                                                                                                               |                                                                                                                                                                                                                                                          | short broad and spatulated distal phalanx of thumb with short broad nails                                                                                                                                                                                                           |                                                                                             | on thumbs and 4th fingers bilaterally, malaligned toes with the 3rd toe under 4th toe bilaterally and broad halluces. |
| Other                                     | Feeding difficulties chokes on lumpy food, GERD, oesophagitis, | Feeding difficulties and gastroesophageal reflux disease, delayed sleep phase disorder, atopic dermatitis | Tracheomalacia, poor muscle tone, wears glasses condition unknown, sensory processing abnormalities, extreme joint laxity | Angelman methylation normal                                 | Diastema, sleep difficulties, frequent sharp screaming, hyperactive behavior, head circumference 48 cm (2 <sup>nd</sup> %ile) | On thickened liquids due to dysphagia. Mild OSA. Torticollis. Negative microarray, metabolic studies, Prader Willi and myotonic dystrophy. Muscle biopsy showed slightly low muscle CoQ10 and low I+III complex but insufficient for a Walker criterion. | right hip contracture adduction --> adductor release operation middle ear infections/glue ears in the past. Very friendly / happy personality. Frequent RTI's in first year and frequent UTI's up till age 4. She has also a de novo c.535C>T p.(Arg179Trp) change in the MED8 gene | Pneumonia at age 13 months. No food aversion, but takes little interest in food and eating. | early pubertal development at age 8 years Tanner 2-3, breast buds                                                     |
| Site for sequencing                       | DDD                                                            | Institut Pasteur                                                                                          | HudsonAlpha Genomic Services Laboratory                                                                                   | DDD                                                         | Institute of Human Genetics, Friedrich-Alexander-Universität Erlangen-Nürnberg, Erlangen, Germany                             | GeneDx                                                                                                                                                                                                                                                   | GeneDx                                                                                                                                                                                                                                                                              | Radboud University Medical Center in Nijmegen                                               | GeneDx                                                                                                                |
| WES or WGS                                | WES                                                            | WES                                                                                                       | WES                                                                                                                       | WES                                                         | WES                                                                                                                           | WES                                                                                                                                                                                                                                                      | WES                                                                                                                                                                                                                                                                                 | WES                                                                                         | WES                                                                                                                   |
| Exome library capture                     | Agilent SureSelect 55MB Exome Plus                             | Agilent SureSelect Human All Exon v4                                                                      | Nimblegen SeqCap EZ Exome v3                                                                                              | Agilent SureSelect 55MB Exome Plus                          | Agilent SureSelect Human All Exon Kit                                                                                         | Agilent SureSelect Human All Exon v4                                                                                                                                                                                                                     | Agilent SureSelect Human All Exon v4                                                                                                                                                                                                                                                | Agilent SureSelect Human All Exon v4                                                        | Agilent SureSelect Human All Exon v4                                                                                  |
| Sequencing                                | Illumina HiSeq                                                 | Illumina HiSeq                                                                                            | Illumina HiSeq                                                                                                            | Illumina HiSeq                                              | Illumina HiSeq                                                                                                                | Illumina HiSeq                                                                                                                                                                                                                                           | Illumina HiSeq                                                                                                                                                                                                                                                                      | Illumina HiSeq                                                                              | Illumina HiSeq                                                                                                        |
| Alignment                                 | BWA                                                            | BWA                                                                                                       | BWA                                                                                                                       | BWA                                                         | SOLiD LifeScope software                                                                                                      | BWA-Mem v.0.7.8, GATK v.1.6                                                                                                                                                                                                                              | BWA-Mem v.0.7.8, GATK v.1.6                                                                                                                                                                                                                                                         | BWA, GATK                                                                                   | BWA-Mem v.0.7.8, GATK v.1.6                                                                                           |
| Variant calling, filtering and annotation | GATK, SAMtools, Dindel, CoNVex, DeNovoGear, VEP version 2.6    | In-house pipeline                                                                                         | GATK, CarpeNovo                                                                                                           | GATK, SAMtools, Dindel, CoNVex, DeNovoGear, VEP version 2.6 | LifeScope and GATK                                                                                                            | SAMtools v.0.1.18                                                                                                                                                                                                                                        | SAMtools v.0.1.18                                                                                                                                                                                                                                                                   | in house pipeline                                                                           | SAMtools v.0.1.18                                                                                                     |
| ACMG classification of variants           | Uncertain Significance                                         | Uncertain Significance                                                                                    | Uncertain Significance                                                                                                    | Uncertain Significance                                      | Uncertain Significance                                                                                                        | Uncertain Significance                                                                                                                                                                                                                                   | Uncertain Significance                                                                                                                                                                                                                                                              | Uncertain Significance                                                                      | Uncertain Significance                                                                                                |
| Reference for exome method                | 9                                                              | 10                                                                                                        | 11                                                                                                                        | 9                                                           | 12                                                                                                                            | 5                                                                                                                                                                                                                                                        | 5                                                                                                                                                                                                                                                                                   | 8                                                                                           | 5                                                                                                                     |

Table S3. Information about cell lines obtained and generated in this study.

Information regarding the condition, sex, and source of cell lines used in this experiment.

NDD= Neurodevelopmental Disorder.

| ID                | Condition | Sex | Obtained from | Lines obtained as: | RRID      |
|-------------------|-----------|-----|---------------|--------------------|-----------|
| GM-07492          | Healthy   | M   | Coriell       | Fibroblasts        | CVCL_7467 |
| NCRM1             | Healthy   | M   | Coriell       | iPSCs              | CVCL_1E7  |
| ACTL6Bext33       | NDD       | M   | Biopsy        | Fibroblasts        | N/A       |
| <i>ACTL6B</i> KO1 | N/A       | M   | GM-07492      | Fibroblasts        | N/A       |
| <i>ACTL6B</i> KO2 | N/A       | M   | GM-07492      | Fibroblasts        | N/A       |
| Unrepaired        | N/A       | M   | Patient       | Fibroblasts        | N/A       |
| Successful Repair | N/A       | M   | Patient       | Fibroblasts        | N/A       |

Table S4. Genes that are significantly different in both ChIPseq and RNAseq, within subjects, comparing control cells to patient \*427Aspext\*33.

| Gene                      | ChIPSeq           |       | RNAseq                 |          |
|---------------------------|-------------------|-------|------------------------|----------|
|                           | fold change in D5 | FDR p | log2 fold change in D5 | padj     |
| <b>Control (D0 vs D5)</b> |                   |       |                        |          |
| <i>A4GALT</i>             | -1.78             | 0.008 | -2.27                  | 3.44E-17 |
| <i>CNNM2</i>              | -1.68             | 0.01  | 0.77                   | 4.40E-13 |
| <i>NID1</i>               | -1.52             | 0.023 | -1.63                  | 1.12E-09 |
| <i>CERK</i>               | -1.84             | 0.004 | 0.45                   | 2.72E-09 |
| <i>BTBD11</i>             | -1.36             | 0.024 | 1.17                   | 5.32E-08 |
| <i>SCUBE3</i>             | -1.44             | 0.023 | 0.7                    | 6.23E-08 |
| <i>PRTG</i>               | -1.44             | 0.024 | 1.09                   | 1.50E-07 |
| <i>PHLDA2</i>             | -1.31             | 0.048 | -1.57                  | 1.19E-05 |
| <i>ST8SIA3</i>            | -1.55             | 0.023 | 1.05                   | 8.09E-05 |
| <i>NAA20</i>              | -1.35             | 0.044 | -0.47                  | 0.0004   |

|                           |       |        |       |          |
|---------------------------|-------|--------|-------|----------|
| <i>VAV2</i>               | -1.79 | 0.008  | 0.37  | 0.0007   |
| <i>PITPNC1</i>            | -1.39 | 0.027  | -0.51 | 0.01     |
| <i>FGF8</i>               | -1.43 | 0.031  | 1.79  | 0.013    |
| <i>NELFA</i>              | -1.38 | 0.031  | 0.25  | 0.017    |
| <i>CHPF</i>               | -1.49 | 0.023  | -0.62 | 0.021    |
| <i>ZYX</i>                | -1.38 | 0.024  | -0.47 | 0.025    |
| <i>FSCN1</i>              | -1.38 | 0.044  | -0.22 | 0.031    |
| <i>CCDC85A</i>            | -1.33 | 0.038  | 1.2   | 0.044    |
| <b>Patient (D0 vs D5)</b> |       |        |       |          |
| <i>SOX8</i>               | 1.56  | 0.044  | -1.45 | 2.49E-76 |
| <i>KCNJ12</i>             | 1.55  | 0.026  | 2.36  | 3.98E-21 |
| <i>MAP2K3</i>             | 2.13  | 0.004  | 0.5   | 2.02E-07 |
| <i>MAP2K3</i>             | 2.17  | 0.0003 | 0.5   | 2.02E-07 |
| <i>TPPP</i>               | 2.69  | 0.0002 | 1.22  | 2.34E-07 |
| <i>ESPNP</i>              | 1.89  | 0.024  | -3.2  | 0.011    |

Table S5. Antibodies used in Immunocytochemistry, Western Blots, and Chromatin Immunoprecipitation. Concentration used, Supplier and Catalog number is provided for each antibody. The BAF53B antibody used in this experiment was a gift from the lab of Dr. Crabtree. ICC= Immunocytochemistry, WB= Western Blot, ChIP= Chromatin Immunoprecipitation

| Antibody  | Use | Concentration Used | Supplier               | Catalog Number |
|-----------|-----|--------------------|------------------------|----------------|
| Tuj1      | ICC | 1/2000             | Abcam                  | ab14545        |
| Nestin    | ICC | 1/2000             | Stem cell Technologies | 60091          |
| SOX1      | ICC | 1/1000             | Stem cell Technologies | 60095          |
| OCT4      | ICC | 1/100              | Stem cell Technologies | 60093          |
| PAX6      | ICC | 1/500              | Stem cell Technologies | 60094          |
| TRA-1-60  | ICC | 1/100              | Abcam                  | ab109884       |
| Nanog     | ICC | 1/100              | Abcam                  | ab109884       |
| SSEA      | ICC | 1/100              | Abcam                  | ab109884       |
| MAP2      | ICC | 1/100              | Abcam                  | ab109884       |
| ALEXA 488 | ICC | 1/2000             | Invitrogen             | A-11008        |
| ALEXA 555 | ICC | 1/2000             | Invitrogen             | A-21422        |
| BAF53B    | WB  | 1/1000             | Crabtree Lab           | N/A            |

|                                    |      |         |            |          |
|------------------------------------|------|---------|------------|----------|
| BAF53A                             | WB   | 1/2000  | Abcam      | ab3882   |
| SMARCA4                            | WB   | 1/5000  | Santa-Cruz | sc-10768 |
| $\beta$ -Actin                     | WB   | 1/10000 | Abcam      | ab49900  |
| Goat Anti-Rabbit IgG<br>H&L (HRP)  | WB   | 1/5000  | Abcam      | ab6721   |
| Rabbit Anti-Mouse<br>IgG H&L (HRP) | WB   | 1/5000  | Abcam      | ab6728   |
| SMARCA4                            | ChIP | 1/200   | Santa-Cruz | sc-17796 |
| SMARCA4                            | ChIP | 1/100   | Santa-Cruz | sc-10768 |

Table S6. Primers used in qPCR analysis

Forward and Reverse primers used in this study. All Primers were used at a final concentration of 10 $\mu$ M.

| Gene           | Forward                | Reverse                |
|----------------|------------------------|------------------------|
| <i>ACTL6B</i>  | CCTTACATGATCGCAGCCAA   | CAGCCACCTGTTTCATCGTAG  |
| <i>ACTL6A</i>  | CAGTCACTTCGCCAGTTAGC   | CACCAGCATAACCAGCTCTC   |
| <i>SMARCA4</i> | CTAACCCACCCAACCTCACC   | TAGTACTCGGGCAGCTCCTT   |
| <i>SEMA4D</i>  | AGGCCCTGAAGAAGTATCAA   | TCCACATTTCCCAGTTCTCC   |
| <i>GAPDH</i>   | TTCTCAAGCTCATTTCCTGG   | TGTGAGGAGGGGAGATTGAG   |
| <i>ALDH1A</i>  | CTGCTGGCGACAATGGAGT    | CGCAATGTTTTGATGCAGCCT  |
| <i>COL1</i>    | GAGGGCCAAGACGAAGACATC  | CAGATCACGTCATCGCACAAAC |
| <i>PAX6</i>    | AACGATAACATACCAAGCGTGT | GGTCTGCCCGTTCAACATC    |
| <i>IGF2</i>    | AGACGTACTGTGCTACCCC    | TGCTTCCAGGTGTCATATTGG  |
| <i>BMP4</i>    | GCACTGGTCTTGAGTATCCTG  | TGCTGAGGTTAAAGAGGAAACG |
| <i>PDGFRA</i>  | AACCGTGTATAAGTCAGGGGA  | ATTTCTTCCAGCATTGTGAT   |
| <i>CDH1</i>    | CGAGAGCTACACGTTACGG    | GGGTGTCGAGGGAAAAATAGG  |

|              |                         |                         |
|--------------|-------------------------|-------------------------|
| <i>SOX7</i>  | TCGACGCCCTGGATCAACT     | CTGGGAGACCGGAACATGC     |
| <i>GATA1</i> | TGCGGCCTCTATCACAAGATG   | CTGCCCGTTTACTGACAATCA   |
| <i>TPPP</i>  | TGCCGGACCATCTTTG        | TGCTCTTGTCTTTGAATCGCTTC |
| <i>FSCN1</i> | CACAGGCAAATACTGGACGTT   | CCACCTTGTTATAGTCGCAGAAC |
| <i>PRTG</i>  | AAAAGCTGATCTTGCCTTATCAA | GAGGGTGGGATGAAATCTTG    |



## Supplementary Methods

### Method S1: Ancestry mapping for family R3

In order to determine the probability of the allele having originated in the known common ancestor of the parents, we linked all individuals with known genotypes to the BALSAC population database, which contains the genealogical relationships between 2.9 million current and past individuals within the province of Quebec, Canada, and compared the probability that the known common ancestor contributed the mutation to the probability that the mutation was introduced by any founder of the population and inherited by both parents without being present in the known common ancestor.

We used an importance sampling Monte Carlo method for efficiently simulating the transmission histories of rare alleles through a known genealogy, and obtained probability estimates for the mutation having originated in any common ancestor of the known carriers within the BALSAC genealogy.

Starting from known carriers in the genealogy, we simulated the inheritance of each affected allele through the maternal or paternal sides and backwards through the genealogy until all alleles had coalesced, or founders of the genealogy were reached (i.e., until we encountered individuals with no known parents in the genealogy). When two alleles are inherited through a single individual, they have probability 0.5 of coalescing in the individual, else the individual is simulated to be a homozygote. Because the allele considered here produces a severe phenotype, the true inheritance history was assumed to not contain ancestral homozygotes.

Representing the set of observed carriers within the genealogy as  $S$ , a possible ancestral origin of the allele as  $a$ , and the inheritance history as  $\Gamma$ , we defined the indicator function

$$\mathbb{1}_a(\Gamma) = \begin{cases} 1, & \text{if } \Gamma \text{ coalesces to } a \text{ and contains no ancestral homozygotes} \\ 0, & \text{otherwise} \end{cases}$$

Our simulations then gave us the probability of the observed carriers given that the true ancestral origin  $A$  is ancestor  $a$

as:

$$P(S|A = a) = P(\Gamma \text{ coalesces to } a) = E[\mathbb{1}_a(\Gamma)] \simeq \frac{1}{M} \sum_{i=1}^M \mathbb{1}_a(\Gamma_i)$$

where the last step is a Monte Carlo integration and  $\Gamma_i$  is the tree created in simulation  $i$ . We used a new importance sampling scheme to vastly accelerate convergence of the Monte-Carlo integral in Equation – details of the importance sampling scheme will be described elsewhere<sup>13</sup>.

Assuming a flat prior for all ancestors, Bayes theorem provides the normalized posterior probability that  $a$  is the founding carrier:

$$P(A = a|S) = \frac{P(S|A = a)P(A = a)}{\sum_{a' \in A} P(S|A = a')P(A = a')} = \frac{P(S|A = a)}{\sum_{a' \in A} P(S|A = a')}$$

**Method S2: *ACTL6B* CRISPR KO Experiments**

**Type of CRISPR System used:** Double Nickase

**Section of *ACTL6B* Gene targeted:** hg19\_dna range=chr12:13722703-13722942

AGGTGACAGGCCCGGGGTGCC**CAGAGCTCGGATGGATGG**CGCGGGTTTGGAACGCAGGGCTGCGGGAGCCGGG  
GGCCCGAGGCTCGCTCACCT**CCGCCGTAGACGCCCCCGCTCAT**AGTGCCCG**CTGCGCTGCTAGCGGCCGTGGGC**  
GGTGGCGGGATCAGCACCGAGGCGGCCGGACAGCTCCCGGGATCCCTGGCGGGGGCGGG**ACTCTCAGCGGCCAAT**  
**TGGGAGGCCGGATCCCCCGC**

**FWD CRISPR gRNA sequence:**

**CCGTAGACGCCCCCGCTCAT**

**REV CRISPR gRNA sequence:**

**ACGGGCCGCTAGCAGCGCAG**

Sanger Forward Primer sequence: CAGAGCTCGGATGGATGG

Sanger Reverse Primer sequence: AATTGGCCGCTGAGAGT

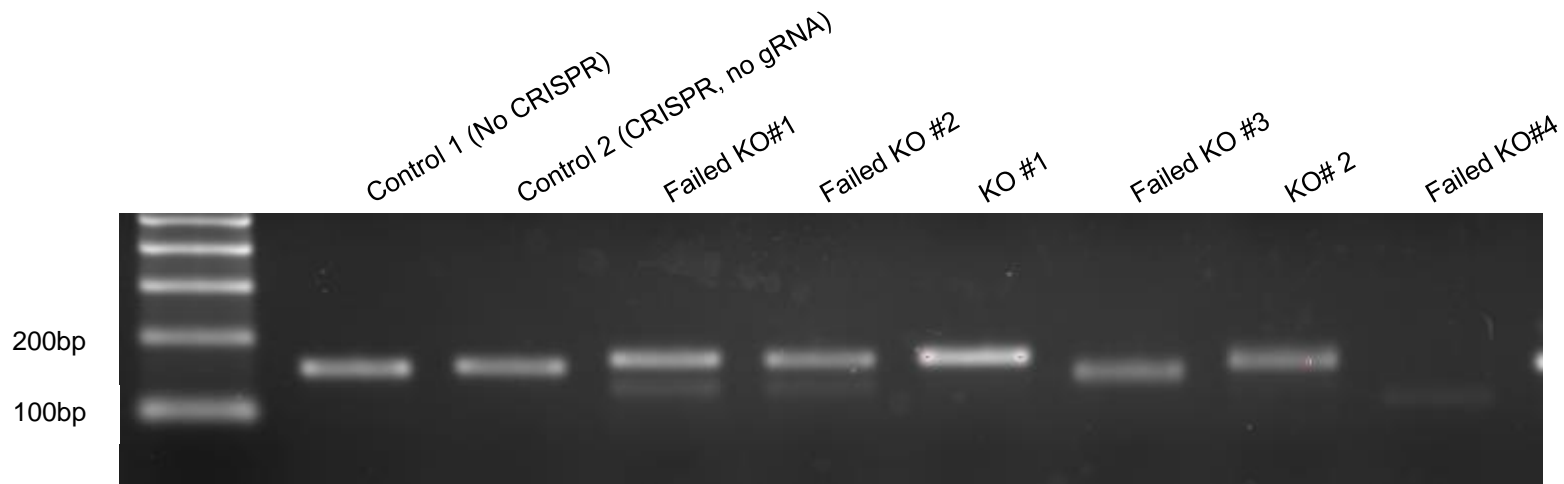

Raw Fasta sequences from Sanger sequencing (reverse strand)

Control

```
tttcccgtcgcgcggtgacgggggatccggcctccaattggccgctgagagtcccggccgagggatcccgggagctgtccggccgctcgggtgctgatcccgccaccgcccacg  
ggccgctagcagcgcagcgggcactatgagcggggcgctctacggcggaggtgagacaatgaccnaccgg
```

### ACTL6B KO1

cgctgcgcgcttgacgggggatccggcctccaattggccgctgagagtcccgccccgccagggatcccgggagctgtccggccgcctcggctgatcccgccaccgcccacgggcc  
gctagcagcgcagcgggcactatgctgggcactatgagcggggcgctctacggcggaggtgagacaatgaccgaccgga

### ACTL6B KO2

ccgctgcgcgcttgacgggggatccggcctccaattggccgctgagagtcccgccccgccagggatcccgggagctgtccggccgcctcggctgatcccgccaccgcccacgggcc  
cgctagcagcgcagcgggcactatgagcggggcgctctagctggcagcggaggtgagacaatgaccgaccgg

### Alignment (sense strand)

|            |                                                                    |
|------------|--------------------------------------------------------------------|
| Control    | cgggcactatgagcggggcgctctacggcggaggtgagacaatgaccgaccgg              |
| ACTL6B KO1 | cgggcactatgctgggcactatgagcggggcgctctacggcggaggtgagacaatgaccgaccgga |
| ACTL6B KO2 | cgggcactatgagcggggcgctctagctggcagcggaggtgagacaatgaccgaccgg         |

### Chromatograms (sense strand)

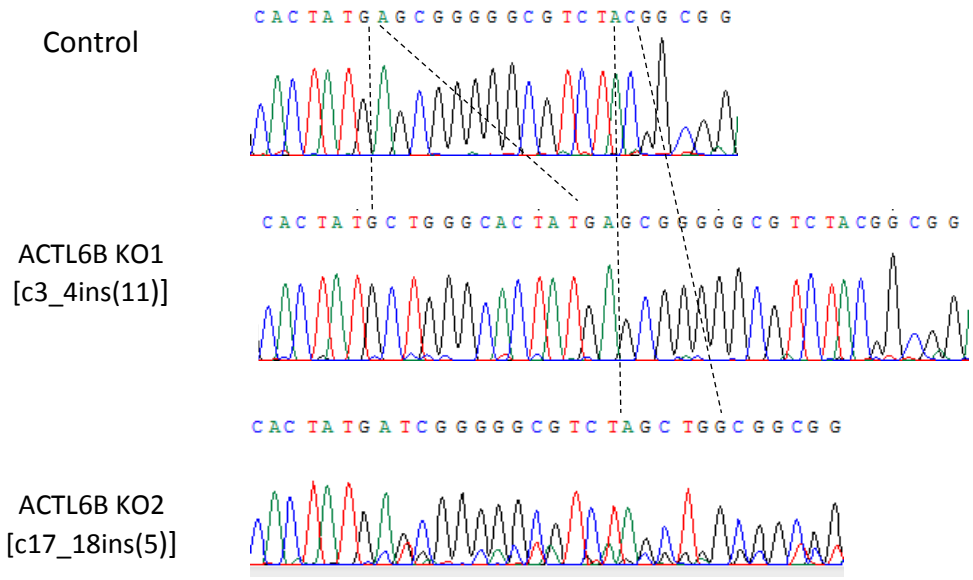

**Method S3: ACTL6B Repair CRISPR Experiment**

**Type of CRISPR System used:** Wild Type

**Section of patient ACTL6B gene targeted:** >hg19\_dna range=chr7:100240745-100240994

GTGTAGAAGTGAGACTCCCTCCCCTCACCTCCCTCCAGACCCCTGTGCCCACTCCCCACCCCACGGAGGCCAACT  
TTTTTTTCTTAAACATTTTTACTTCTTTCAACCCAGAAACATCACCATTAATGAGGACAAGAGGGAAAGGAGGAGGGG  
GGCAATGTGGCATGGGGGTTAAGGGACTTCCATCTGAGCTTGGGAGCAGGTGTGTGGGGAGGAGTGCCATCGGGG  
CACTTTCGCTCCACGCACTGCTTCCCGCCCTCCTCATATTCCTGCTTGGAGATCCACATCTGCTGGAAAGTGCCCTG  
GGTGGAGGGGGTAATATCAGGGTCAGGGTGGCCTTGGAGGGAGGTGTGGACAGGCAGGTGCAGCCCCTGGGAATC  
CTCCAACAGGCCCAACCACCCCTTGGGTTACATCCCTCTGAAGCCCCTCCCCACCTCATCCTCCC

**Control Sequence:** GTGTGGGGAGGAGTGCCATCAGGGGCACTTT (Control)

**Patient Sequence:** GTGTGGGGAGGAGTGCCATC-GGGGCACTTT (patient)

**gRNA Sequence:** TGTGGGGAGGAGTGCCATC-G

**Repair Sequence:**GGGTTAAGGGACTTCCATCTGAGCTTGGGAGCAGGTGTGTGG

GGAGGAGTGCCATCAGGGGCACTTTCGCTCCACGCACTGCTTCCCGCCCTCCTCATATTCCTGCTTGG

Sanger Forward Primer sequence: **CTTTCAACCCAGAAACATCACCATTAAT**

Sanger Reverse Primer sequence: **AGCAGATGTGGATCTCCAAGCAG**

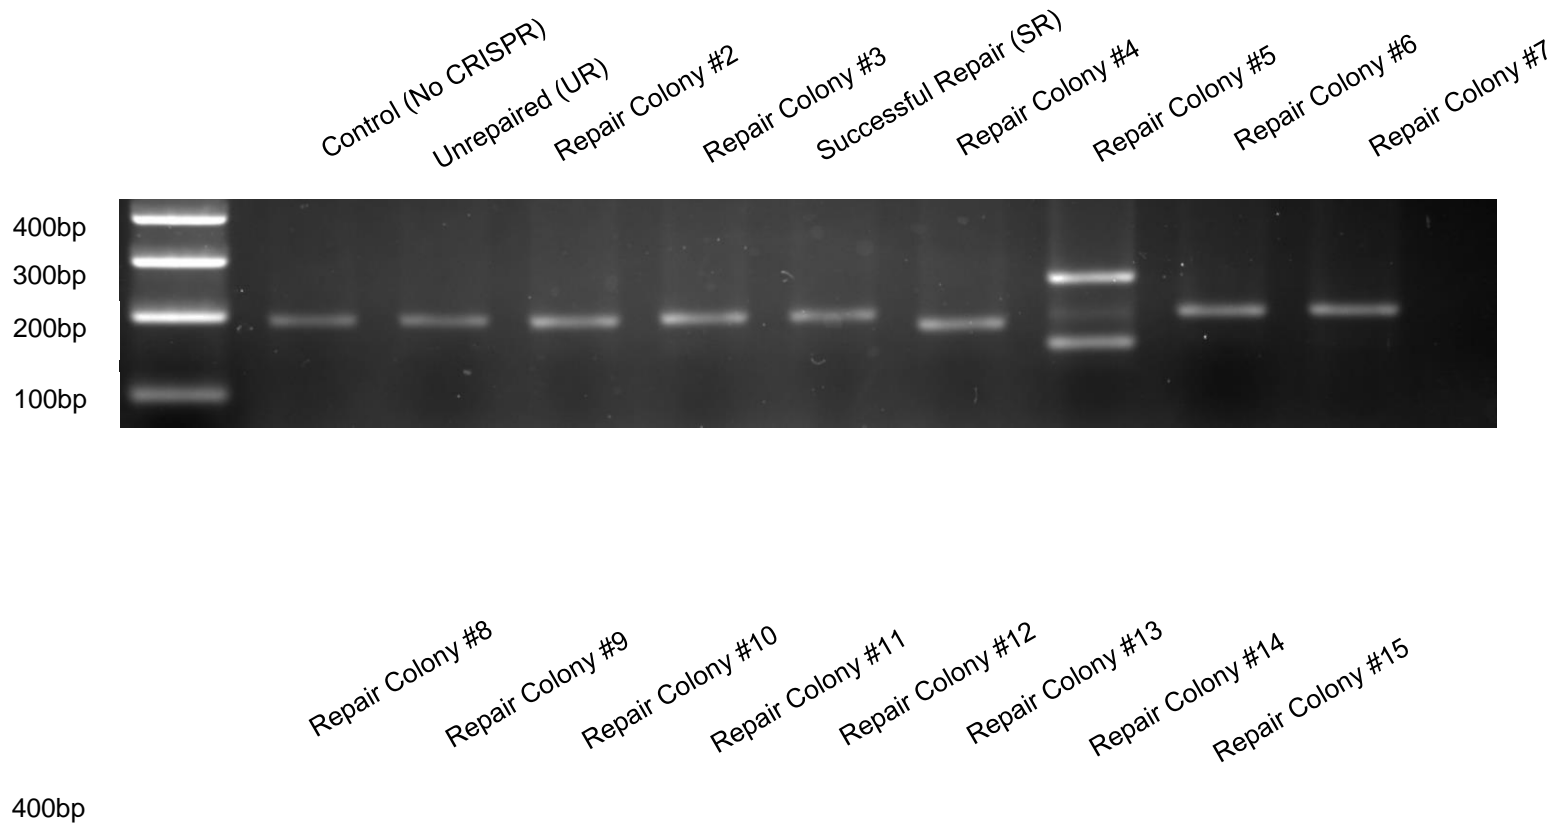



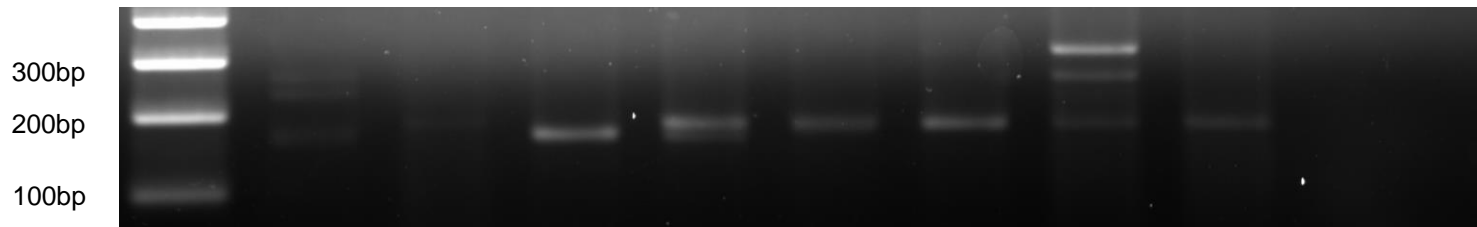

**Raw Fasta sequences from Sanger sequencing (Sense Strand)**

**Unrepaired (UR)**

gggggcatgtggcatgggggtaagggacttccatctgagctgggagcaggtgtgtggggaggagtgccatcggggcacttcgctccacgcactgctcccgccctctc  
 atattcctgcttgagatccacatctgc

**Successful Repair (SR)**

ggacttccatctgagcttgggagcaggtgtgtggggaggagtgccatcaggggcacttcgctccacgcactgctcccgccctctcatattcctgcttgagatccacatctg

## Alignment (Sense Strand)

Unrepaired (UR)      gaggagtccatc-ggggcactttcgctccacgcactgcttcccgcctcc

Successful Repair (SR)      gaggagtccatcaggggcactttcgctccacgcactgcttcccgcctcc

## Chromatograms (Sense Strand)

Unrepaired (UR)

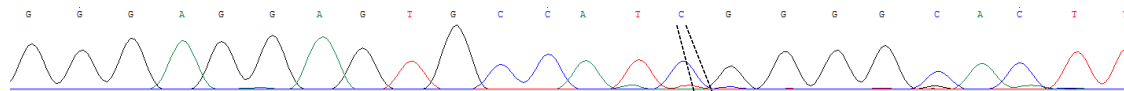

Successful Repair (SR)

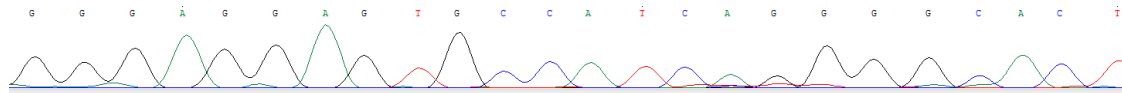

#### **Method S4: Confirmation of homozygous CRISPR KO and Repair**

**Note:** all PCR reactions conducted with 100ng of gDNA, all bar graphs show N=3 data points, with error bars representing standard error around the mean.

In order to confirm that all of our gene editing events were homozygous, and not the result of off-target gene editing events that have resulted in a large deletion one allele which prevents PCR amplification, we first designed primers that covered ~800bp both upstream and downstream of both the ACTL6B KO and ACTL6B repair gene editing site. We then ran the PCR products on an agarose gel and screened for any bands that would indicate large deletions or insertions.

**Section of genome targeted centered on ACTL6B KO site :** >hg19\_dna range= chr7:100,253,189-100,254,802

Forward Primer: CACTGTGGTGGGAAGTCAG

Reverse Primer: AGATGGAGACACCCCCTT

Size of Product: 1614

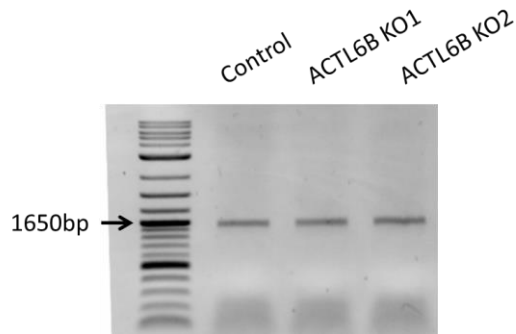

**Section of genome targeted centered on ACTL6B Repair site:** >hg19\_dna range= chr7:100,239,869-100,241,468

Forward Primer: GTTTGGTCACCGAAGGACTTG

Reverse Primer: ATGCTCATTGCAGGAACCTC

Size of Product: 1600

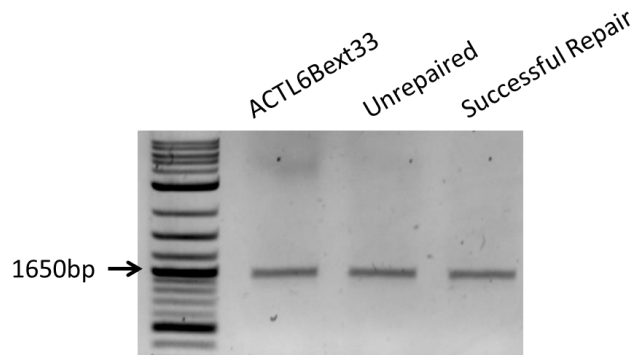

We did not observe any bands in any lines that would suggest that there were any large insertions or deletions. However, this did not eliminate the possibility that a large deletion had deleted the entire ACTL6B gene on one allele. To rule out this possibility, we designed primers to the center of the ACTL6B gene and loaded equal amount of DNA from all cell lines. We examined the resulting products for a large reduction of product, as would happen if only one allele of the gene was accessible for PCR amplification. In

order to have a positive control for the experiment, we ran a separate qPCR reaction with primers designed to the X chromosome with equal amounts of male and female DNA.

Test of system conducted using primers targeting sequences on X-chromosome

**Section of genome targeted:** >hg19\_dna range=chrX:133612614-133613151

Forward Primer: ATTGCCTGGGGATTCCAATAC

Reverse Primer: AATATCACAGGGCAGAAAAGGTCA

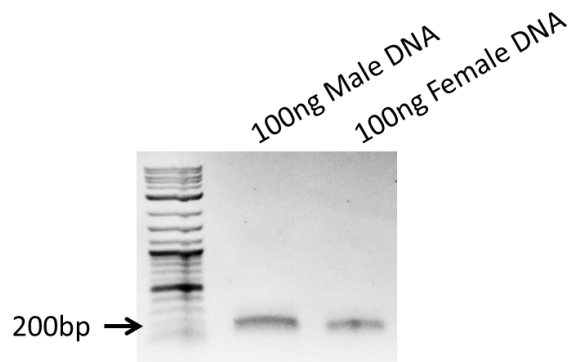

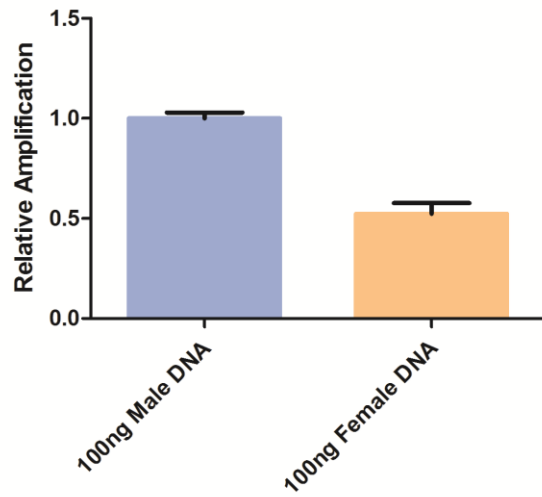

**Section of genome targeted on ACTL6B gene : >hg19\_dna range= chr7:100,247,392-100,247,578**

Forward Primer: TTCCAGCCCCTACTCTCTCC

Reverse Primer: GTCAGGCCTGGTTCTCTGAA

Size of Product: 187bp

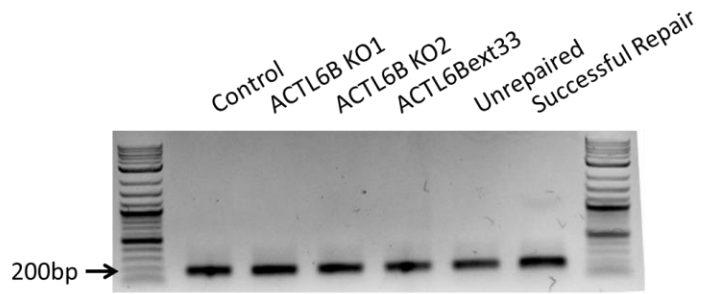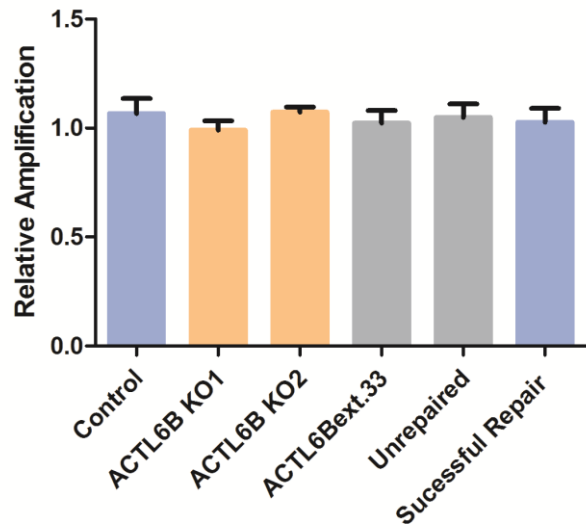

## Supplemental References

1. Hamdan, F.F. *et al.* High Rate of Recurrent De Novo Mutations in Developmental and Epileptic Encephalopathies. *Am J Hum Genet* **101**, 664-685 (2017).
2. Raczky, C. *et al.* Isaac: ultra-fast whole-genome secondary analysis on Illumina sequencing platforms. *Bioinformatics* **29**, 2041-3 (2013).
3. Fukai, R. *et al.* De novo KCNH1 mutations in four patients with syndromic developmental delay, hypotonia and seizures. *J Hum Genet* **61**, 381-7 (2016).
4. Bredrup, C. *et al.* High myopia-excavated optic disc anomaly associated with a frameshift mutation in the MYC-binding protein 2 gene (MYCBP2). *Am J Ophthalmol* **159**, 973-9 e2 (2015).
5. Tanaka, A.J. *et al.* Mutations in SPATA5 Are Associated with Microcephaly, Intellectual Disability, Seizures, and Hearing Loss. *Am J Hum Genet* **97**, 457-64 (2015).
6. Zollo, M. *et al.* PRUNE is crucial for normal brain development and mutated in microcephaly with neurodevelopmental impairment. *Brain* **140**, 940-952 (2017).
7. Strom, S.P. *et al.* De Novo variants in the KMT2A (MLL) gene causing atypical Wiedemann-Steiner syndrome in two unrelated individuals identified by clinical exome sequencing. *BMC Med Genet* **15**, 49 (2014).
8. Neveling, K. *et al.* A post-hoc comparison of the utility of sanger sequencing and exome sequencing for the diagnosis of heterogeneous diseases. *Hum Mutat* **34**, 1721-6 (2013).
9. Wright, C.F. *et al.* Genetic diagnosis of developmental disorders in the DDD study: a scalable analysis of genome-wide research data. *Lancet* **385**, 1305-14 (2015).
10. Mercati, O. *et al.* CNTN6 mutations are risk factors for abnormal auditory sensory perception in autism spectrum disorders. *Mol Psychiatry* **22**, 625-633 (2017).
11. Worthey, E.A. Analysis and Annotation of Whole-Genome or Whole-Exome Sequencing Derived Variants for Clinical Diagnosis. *Curr Protoc Hum Genet* **95**, 9 24 1-9 24 28 (2017).
12. Riecken, L.B. *et al.* Inhibition of RAS activation due to a homozygous ezrin variant in patients with profound intellectual disability. *Hum Mutat* **36**, 270-8 (2015).
13. BALSAC Population Database: Annual Report 2014-2016. (2017).
